# Supplementary figures and images for: The Primary Glucose-Lowering Effect of Metformin Resides in the Gut, Not the Circulation: Results From Short-term Pharmacokinetic and 12-Week Dose-Ranging Studies
Source: Oxford University Press journal article supplement (doi:10.2337/dc15-0488), 2015-08-18

SUPPLEMENTARY DATA

Supplementary Figure 1. Study 2 Flow Diagram

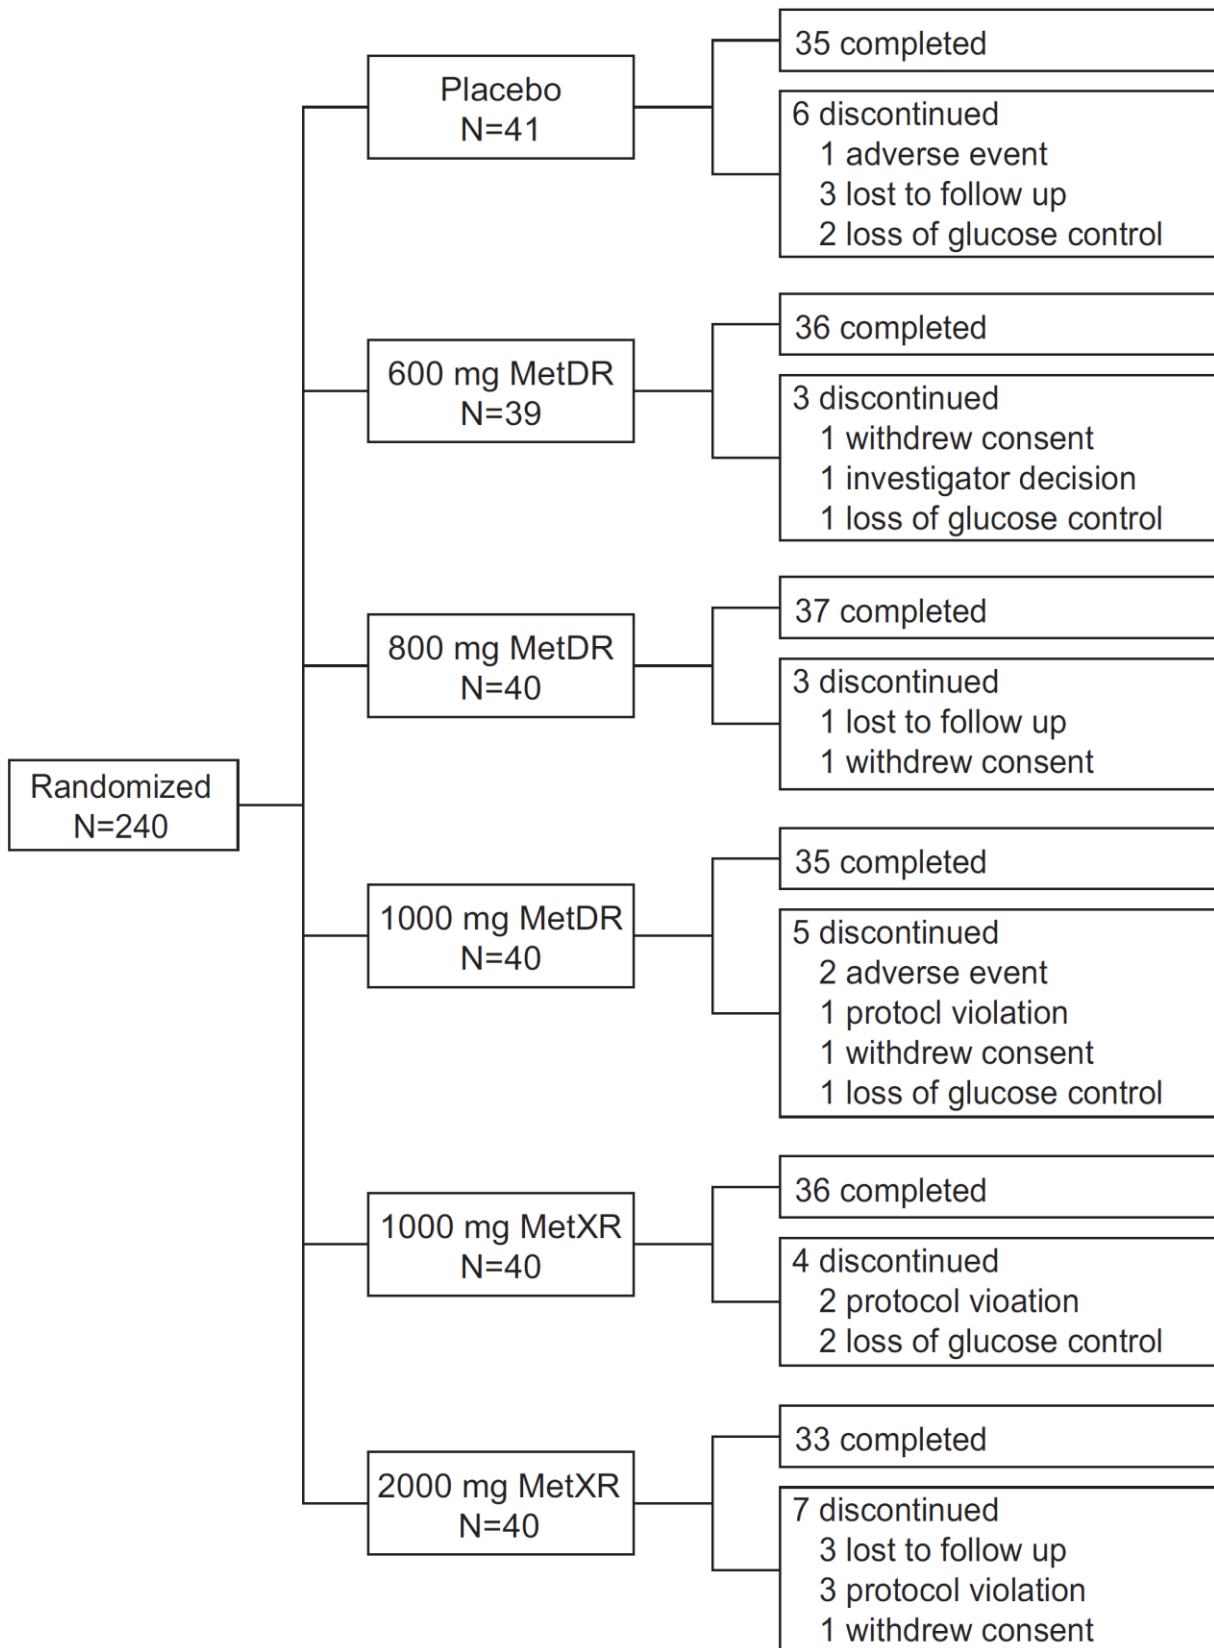

Supplement: dc150488supplementarydata.pdf [file dc150488supplementarydata.pdf]
